# Supplementary material for: Generation of chromioenamines by reduction of O-acetyloximes with chromium(ii) and their application
Source: Royal Society of Chemistry journal article supplement (doi:10.1039/b105357b), 2001-01-01
Supplement: b105357b.doc [file b105357b.doc]

**Electronic Supplementary Information**

Generation of Chromioenamines by Reduction of *O*-Acetyloximes with Chromium(II) and their Application

Kazuhiko Takai,* Noriko Katsura and Yuji Kunisada

***Typical experimental procedure***

**Aldol-type addition** (run 1 in Table 1): A mixture of CrCl2 (0.44 g, 3.6 mmol) and NiCl2 (47 mg, 0.36 mmol) in dry, oxygen-free THF (10 mL) was stirred at 25 °C for 30 min. A solution of benzaldehyde (0.11 g, 1.0 mmol) in THF (2 mL) and a solution of *O*-acetyloxime **8** (0.14 g, 1.2 mmol) in THF (2 mL) were added to the suspension successively. The resulting mixture was stirred at 25 °C for 8 h. Saturated sodium fluoride solution (10 mL) was added to the mixture, and the mixture was stirred at 25 °C for 6 days. This mixture was extracted with ether (4x10 mL), and the organic extracts were dried over anhydrous magnesium sulfate and concentrated. Purification by column chromatography on silica gel (hexane-ethyl acetate, 2/1) gave 4-hydroxy-4-phenyl-2-butanone (**9**) in 84% yield (0.14 g, 0.84 mmol) as a colourless oil:

**Preparation of -amino alcohol 16** (run 1 in Table 2): A mixture of CrCl2 (0.66 g, 5.4 mmol) and NiCl2 (70 mg, 0.54 mmol) in dry, oxygen-free THF (10 mL) was stirred at 25 °C for 30 min. A solution of benzaldehyde (0.11 g, 1.0 mmol) in THF (2 mL) and a solution of *O*-acetyloxime **8** (0.21 g, 1.8 mmol) in THF (2 mL) were added to the suspension successively. The resulting mixture was stirred at 25 °C for 24 h. The mixture was cooled to -78 °C, and a solution of LiAlH4 in THF (f = 1.0, 15 mL, 15 mmol) was added slowly to the mixture. The resulting mixture was warmed to 0 °C in 2 h and stirred at the temperature for 30 min. Sodium fluoride (10 g), dichloromethane (18 mL), and an aqueous solution of sodium hydroxide (1.0 M, 4.4 mL) were added successively to the mixture. After being warmed to 25 °C, the mixture was filtered and washed with ethyl acetate, and the filtrate was dried over anhydrous MgSO4. The concentrated crude product was acetylated with acetic anhydride (0.88 mL, 9.3 mmol), pyridine (0.24 mL, 3.2 mmol), and DMAP (9.8 mg, 0.080 mmol) in dichloromethane (3.5 mL). After acetylation, all volatile materials were removed under reduced pressure, and the mixture was purified by column chromatography on silica gel (ethyl acetate) to give 3-acetylamino-1-acetoxy-1-phenylbutane (**16**) in 86% yield (0.22 g, 0.86 mmol, *syn* / *anti* = 70 / 30) as a colourless oil: ***syn*-3-acetylamino-1-acetoxy-1- phenylbutane:**1 1H NMR (CDCl3):  1.14 (d, *J* = 6.3 Hz, 3H), 1.82-2.15 (m, 2H), 1.93 (s, 3H), 2.08 (s, 3H), 3.94-4.03 (m, 1H), 5.38-5.44 (br, 1H), 5.73-5.78 (m, 1H), 7.27-7.37 (m, 5H). ***anti*-3-acetylamino-1-acetoxy-1-phenylbutane:**1 1H NMR (CDCl3):  1.18 (d, *J* = 6.7 Hz, 3H), 1.82-2.15 (m, 2H), 1.90 (s, 3H), 2.07 (s, 3H), 4.10-4.16 (m, 1H), 5.18-5.38 (br, 1H), 5.73-5.78 (m, 1H), 7.27-7.37 (m, 5H).

1 K. Narasaka, Y. Ukaji and S. Yamazaki, *Bull. Chem. Soc. Jpn*, 1986, **59**, 525.
